# Supplementary material for: Birth Time and Early Outcomes in Very Preterm Infants in China: A Cohort Study
Source: Research Square preprint supplement (doi:10.21203/rs.3.rs-6182353/v1), 2025-03-17
Supplement: Supplementary file 1 [file 66d3995e7773cbca0e214e1b.docx]

S**upplementary Table 1 Maternal and Neonatal Characteristics of the Study Population, Stratified by infants born on Weekday/Non-weekday**

| **Characteristics, n/N (%)** | **Weekday birth, N=13,044** | **Non-weekday birth, N=4,626** | **p-value** |
| --- | --- | --- | --- |
| **Maternal characteristics** |  |  |  |
| Maternal Age, Mean(SD), y | 31.1(4.8) | 30.9(4.9) | 0.044 |
| Maternal Diabetics | 2,721/13,026(20.9%) | 988/4,617(21.4%) | 0.5 |
| Hypertensive disorders | 2,868/13,030(22.0%) | 777/4,621(16.8%) | <0.001 |
| Antenatal steroids | 10,839/12,992(83.4%) | 3,796/4,604(82.5%) | 0.13 |
| Receive MgSO4 | 7,802/12,955(60.2%) | 2,704/4,598(58.8%) | 0.092 |
| Placental abruption | 781/13,043(6.0%) | 334/4,624(7.2%) | 0.003 |
| Placenta previa | 1,024/13,043(7.9%) | 400/4,624(8.7%) | 0.086 |
| Chorioamnionitis | 2,592/13,044(19.9%) | 969/4,626(20.9%) | 0.12 |
| Premature rupture of membranes>24h | 7,964/12,942(61.5%) | 2,942/4,590(64.1%) | 0.002 |
| Cervical incompetence | 1,196/13,044(9.2%) | 472/4,626(10.2%) | 0.039 |
| Cesarean delivery | 8,160/13,038(62.6%) | 2,540/4,621(55.0%) | <0.001 |
| **Neonatal characteristics** |  |  |  |
| Gestational age, wks |  |  | 0.3 |
| 240~276 | 2,203/13,044(16.9%) | 815/4,626(17.6%) |  |
| 280~296 | 4,263/13,044(32.7%) | 1,538/4,626(33.2%) |  |
| 300~316 | 6,578/13,044(50.4%) | 2,273/4,626(49.1%) |  |
| Birth weight, Mean(SD) | 1,310.9(319.4) | 1,320.4(321.5) | 0.08 |
| Male | 7,252/13,044(55.6%) | 2,603/4,626(56.3%) | 0.4 |
| sGA1 | 1,078/13,044(8.3%) | 318/4,626(6.9%) | 0.003 |
| Single birth | 8,950/13,044(68.6%) | 3,214/4,626(69.5%) | 0.3 |
| 1-min Apgar score≤3 | 655/13,006(5.0%) | 267/4,611(5.8%) | 0.048 |

SD: standard deviation; sGA: small for gestational age

**Supplementary Table2 Association between birth days and neonatal outcomes**

| **Outcomes, n/N(%)** | **Day of birth, n/N(%)** | | **p-value** | **Crude model** | **Adjusted Model Ab** | **Adjusted Model Bc** |
| --- | --- | --- | --- | --- | --- | --- |
| **Weekday, N = 13,044** | **Non-weekday, N = 4,626** | **Unadjusted OR(95%CI)a** | **aOR(95%CI) a** | **aOR(95%CI) a** |
| **Primary outcome** |  |  |  |  |  |  |
| Mortality in hospital | 1,395/13,044(10.7%) | 492/4,626(10.6%) | >0.9 | 0.99(0.89, 1.11) | 0.96(0.85, 1.08) | 0.96(0.85, 1.08) |
| **Delivery room resuscitation** |  |  |  |  |  |  |
| Intensive resuscitation | 3,201/13,019(24.6%) | 1,141/4,615(24.7%) | 0.9 | 1.01(0.93, 1.09) | 1.01(0.93, 1.10) | 1.03(0.95, 1.12) |
| 5-min Apgar score≤7 | 1,442/12,899(11.2%) | 544/4,566(11.9%) | 0.2 | 1.07(0.97, 1.19) | 1.07(0.95, 1.19) | 1.08(0.97, 1.21) |
| **Early outcomes in NICU** |  |  |  |  |  |  |
| Hypothermia | 8,514/12,968(65.7%) | 3,027/4,587(66.0%) | 0.7 | 1.02(0.95, 1.09) | 1.03(0.96, 1.10) | 1.01(0.94, 1.09) |
| Surfactant | 7,558/13,044(57.9%) | 2,664/4,626(57.6%) | 0.7 | 0.99(0.92, 1.05) | 1.00(0.93, 1.07) | 1.02(0.95, 1.09) |
| Start mechanical ventilation within 1st day | 4,298/13,044(33.0%) | 1,507/4,626(32.6%) | 0.6 | 0.98(0.92, 1.06) | 0.97(0.90, 1.05) | 0.98(0.91, 1.06) |
| Use vasoactive drug within 1st day | 2,134/13,044(16.4%) | 760/4,626(16.4%) | >0.9 | 1.01(0.92, 1.10) | 0.99(0.90, 1.09) | 1.00(0.91, 1.10) |
| **NICU complications** |  |  |  |  |  |  |
| sIVH | 644/11,617(5.5%) | 224/4,143(5.4%) | 0.7 | 0.97(0.83, 1.14) | 0.96(0.82, 1.12) | 0.96(0.82, 1.13) |
| cPVL | 491/11,579(4.2%) | 192/4,123(4.7%) | 0.3 | 1.10(0.93, 1.31) | 1.09(0.92, 1.30) | 1.08(0.91, 1.29) |
| NEC(stage≥2) | 656/13,044(5.0%) | 201/4,626(4.3%) | 0.063 | 0.86(0.73, 1.01) | 0.85(0.72, 1.00) | 0.87(0.73, 1.02) |
| Late-onset sepsis | 936/13,044(7.2%) | 321/4,626(6.9%) | 0.6 | 0.96(0.84, 1.10) | 0.96(0.84, 1.10) | 0.97(0.85, 1.11) |
| BPD | 4,441/13,044(34.0%) | 1,544/4,626(33.3%) | 0.4 | 0.97(0.90, 1.04) | 0.96(0.88, 1.03) | 0.96(0.89, 1.04) |
| ROP(stage≥3) | 312/10,133(3.1%) | 118/3,608(3.3%) | 0.6 | 1.06(0.86, 1.32) | 1.08(0.86, 1.34) | 1.07(0.85, 1.33) |

NICU: neonatal intensive care unit; sIVH: severe intraventricular hemorrhage; cPVL: cystic periventricular leukomalacia; NEC: necrotizing enterocolitis; BPD: bronchopulmonary dysplasia; ROP: retinopathy of prematurity

**a**Weekday as reference

b Model A adjusted for Diabetics, Hypertension, Placental Previa, Placental Abruption, Cervical incompetence, Chorioamnionitis, ROM, sGA, gestational age

c Nodel B adjusted for model A+ receive MgSO4 + receive antenatal steroids

**Supplementary Table3 Association between birth time on non-weekday and neonatal outcomes**

| **Outcomes, n/N(%)** | **Time on Non-weekday birth, n/N(%)** | | | |  | **Crude model** | |  | **Adjusted Model Ab** | |  | **Adjusted Model Bc** | |
| --- | --- | --- | --- | --- | --- | --- | --- | --- | --- | --- | --- | --- | --- |
| **Daytime, N = 2,055** | **Evening, N = 1,405** | **Night, N = 1,166** | **p-value** |  | **Unadjusted OR(95%CI)a for Evening** | **Unajdusted OR(95%CI) a**  **for Night** |  | **aOR(95%CI) a**  **for Evening** | **aOR(95%CI) a**  **for Night** |  | **aOR(95%CI) a**  **for Evening** | **aOR(95%CI) a**  **for Night** |
| **Primary outcome** |  |  |  |  |  |  |  |  |  |  |  |  |  |
| Mortality in hospital | 220/2,055(10.7%) | 148/1,405(10.5%) | 124/1,166(10.6%) | >0.9 |  | 0.98(0.79, 1.22) | 0.99(0.78, 1.25) |  | 0.96(0.75, 1.22) | 0.98(0.76, 1.27) |  | 0.96(0.75, 1.22) | 0.92(0.71, 1.19) |
| **Delivery room resuscitation** |  |  |  |  |  |  |  |  |  |  |  |  |  |
| Intensive resuscitation | 510/2,052(24.9%) | 345/1,402(24.6%) | 286/1,161(24.6%) | >0.9 |  | 0.99(0.84, 1.15) | 0.99(0.84, 1.17) |  | 0.96(0.81, 1.14) | 1.07(0.89, 1.29) |  | 0.98(0.82, 1.16) | 1.09(0.90, 1.32) |
| 5-min Apgar score ≤7 | 238/2,026(11.7%) | 160/1,385(11.6%) | 146/1,155(12.6%) | 0.7 |  | 0.98(0.79, 1.21) | 1.09(0.87, 1.35) |  | 0.98(0.78, 1.23) | 1.19(0.94, 1.50) |  | 1.01(0.81, 1.27) | 1.16(0.91, 1.48) |
| **Early outcomes in NICU** |  |  |  |  |  |  |  |  |  |  |  |  |  |
| Hypothermia | 1,350/2,038(66.2%) | 927/1,391(66.6%) | 750/1,158(64.8%) | 0.6 |  | 1.02(0.88, 1.18) | 0.94(0.81, 1.09) |  | 1.01(0.87, 1.17) | 0.94(0.81, 1.10) |  | 1.00(0.86, 1.16) | 0.92(0.78, 1.07) |
| Surfactant | 1,202/2,055(58.5%) | 810/1,405(57.7%) | 652/1,166(55.9%) | 0.4 |  | 0.97(0.84, 1.11) | 0.90(0.78, 1.04) |  | 0.91(0.79, 1.06) | 0.92(0.78, 1.07) |  | 0.93(0.80, 1.08) | 0.94(0.80, 1.10) |
| imvday1 | 690/2,055(33.6%) | 443/1,405(31.5%) | 374/1,166(32.0%) | 0.4 |  | 0.91(0.79, 1.05) | 0.93(0.80, 1.09) |  | 0.87(0.75, 1.02) | 0.96(0.82, 1.14) |  | 0.89(0.76, 1.04) | 0.99(0.83, 1.17) |
| inotropsday1 | 340/2,055(16.5%) | 227/1,405(16.2%) | 193/1,166(16.6%) | >0.9 |  | 0.97(0.81, 1.17) | 1.00(0.82, 1.21) |  | 0.95(0.78, 1.14) | 0.99(0.81, 1.21) |  | 0.97(0.80, 1.17) | 1.00(0.81, 1.22) |
| **NICU complications** |  |  |  |  |  |  |  |  |  |  |  |  |  |
| sIVH | 95/1,833(5.2%) | 68/1,277(5.3%) | 61/1,033(5.9%) | 0.7 |  | 1.03(0.74, 1.41) | 1.15(0.82, 1.59) |  | 0.95(0.68, 1.32) | 1.14(0.81, 1.60) |  | 0.96(0.68, 1.33) | 1.05(0.74, 1.48) |
| cPVL | 77/1,823(4.2%) | 63/1,274(4.9%) | 52/1,026(5.1%) | 0.5 |  | 1.18(0.84, 1.66) | 1.21(0.84, 1.73) |  | 1.14(0.81, 1.61) | 1.18(0.81, 1.71) |  | 1.14(0.80, 1.61) | 1.11(0.76, 1.61) |
| NEC(stage≥2) | 85/2,055(4.1%) | 70/1,405(5.0%) | 46/1,166(3.9%) | 0.4 |  | 1.22(0.88, 1.68) | 0.95(0.66, 1.37) |  | 1.22(0.88, 1.69) | 0.94(0.64, 1.36) |  | 1.22(0.88, 1.69) | 0.91(0.62, 1.32) |
| Late-onset sepsis | 158/2,055(7.7%) | 92/1,405(6.5%) | 71/1,166(6.1%) | 0.2 |  | 0.84(0.64, 1.10) | 0.78(0.58, 1.04) |  | 0.84(0.64, 1.10) | 0.79(0.58, 1.06) |  | 0.84(0.64, 1.10) | 0.80(0.59, 1.07) |
| BPD | 694/2,055(33.7%) | 469/1,405(33.4%) | 381/1,166(32.7%) | 0.8 |  | 0.98(0.85, 1.13) | 0.95(0.82, 1.11) |  | 0.95(0.81, 1.11) | 0.97(0.82, 1.14) |  | 0.97(0.83, 1.13) | 0.95(0.80, 1.12) |
| ROP(stage≥3) | 53/1,590(3.3%) | 37/1,117(3.3%) | 28/901(3.1%) | >0.9 |  | 0.99(0.64, 1.52) | 0.93(0.58, 1.47) |  | 0.97(0.62, 1.51) | 0.97(0.59, 1.57) |  | 0.95(0.60, 1.48) | 0.95(0.58, 1.54) |

NICU: neonatal intensive care unit; Intensive resuscitation: including intubation, chest compressions, or epinephrine administration; sIVH: severe intraventricular hemorrhage; cPVL: cystic periventricular leukomalacia; NEC: necrotizing enterocolitis; BPD: bronchopulmonary dysplasia; ROP: retinopathy of prematurity

anon-weekday as reference

b Model A adjusted for Diabetics, Hypertension, Placental Previa, Placental Abruption, Cervical incompetence, Chorioamnionitis, ROM, sGA, gestational age

c Model B adjusted for model A+ receive MgSO4 + receive antenatal steroids

**Supplementary Table4 Maternal and Neonatal Characteristics of the Study Population Born on Weekday Stratified by Gestational Age**

| **Characteristic, n/N (%)** | **GA 240-276 weeks** | | | | **GA 280-296 weeks** | | | | **GA 300-316 weeks** | | | |
| --- | --- | --- | --- | --- | --- | --- | --- | --- | --- | --- | --- | --- |
| **Daytime, N = 1,010** | **Evening, N = 666** | **Night, N = 527** | **p-value** | **Daytime, N = 2,217** | **Evening, N = 1,200** | **Night, N = 846** | **p-value** | **Daytime, N = 3,684** | **Evening, N = 1,665** | **Night, N = 1,229** | **p-value** |
| **Maternal characteristics** |  |  |  |  |  |  |  |  |  |  |  |  |
| Maternal age, Mean(SD), y | 31.57(4.77) | 31.30(4.64) | 31.24(4.64) | 0.4 | 31.16(4.84) | 31.04(5.07) | 30.74(4.71) | 0.1 | 31.11(4.90) | 30.92(4.72) | 30.67(4.85) | 0.038 |
| Maternal Diabetics | 211/1,008(21%) | 113/666(17%) | 114/525(22%) | 0.069 | 449/2,215(20%) | 242/1,199(20%) | 202/844(24%) | 0.062 | 779/3,681(21%) | 330/1,661(20%) | 281/1,227(23%) | 0.14 |
| Hypertensive disorders | 166/1,009(16%) | 53/666(8.0%) | 32/527(6.1%) | <0.001 | 572/2,213(26%) | 248/1,198(21%) | 69/845(8.2%) | <0.001 | 1,150/3,681(31%) | 441/1,663(27%) | 137/1,228(11%) | <0.001 |
| Antenatal steroids | 810/1,008(80%) | 530/663(80%) | 391/526(74%) | 0.016 | 1,890/2,207(86%) | 980/1,199(82%) | 690/846(82%) | 0.002 | 3,178/3,665(87%) | 1,382/1,658(83%) | 988/1,220(81%) | <0.001 |
| Receive MgSO4 | 612/1,007(61%) | 368/664(55%) | 279/525(53%) | 0.008 | 1,401/2,191(64%) | 690/1,194(58%) | 475/845(56%) | <0.001 | 2,353/3,655(64%) | 954/1,657(58%) | 670/1,217(55%) | <0.001 |
| Placental abruption | 65/1,010(6.4%) | 60/666(9.0%) | 40/527(7.6%) | 0.15 | 132/2,217(6.0%) | 77/1,200(6.4%) | 72/846(8.5%) | 0.037 | 147/3,683(4.0%) | 95/1,665(5.7%) | 93/1,229(7.6%) | <0.001 |
| Placenta previa | 86/1,010(8.5%) | 57/666(8.6%) | 44/527(8.3%) | >0.9 | 174/2,217(7.8%) | 100/1,200(8.3%) | 85/846(10%) | 0.15 | 241/3,683(6.5%) | 121/1,665(7.3%) | 116/1,229(9.4%) | 0.003 |
| Chorioamnionitis | 287/1,010(28%) | 181/666(27%) | 124/527(24%) | 0.12 | 446/2,217(20%) | 267/1,200(22%) | 191/846(23%) | 0.2 | 581/3,684(16%) | 280/1,665(17%) | 235/1,229(19%) | 0.024 |
| Premature rupture of membranes>24h | 615/1,001(61%) | 420/662(63%) | 356/524(68%) | 0.043 | 1,391/2,198(63%) | 755/1,191(63%) | 558/839(67%) | 0.2 | 2,107/3,654(58%) | 993/1,657(60%) | 769/1,216(63%) | 0.002 |
| Cervical incompetence | 175/1,010(17%) | 162/666(24%) | 106/527(20%) | 0.002 | 190/2,217(8.6%) | 128/1,200(11%) | 82/846(9.7%) | 0.13 | 158/3,684(4.3%) | 100/1,665(6.0%) | 95/1,229(7.7%) | <0.001 |
| **Neonatal characteristics** |  |  |  |  |  |  |  |  |  |  |  |  |
| Male | 582/1,010(58%) | 360/666(54%) | 294/527(56%) | 0.3 | 1,231/2,217(56%) | 676/1,200(56%) | 481/846(57%) | 0.8 | 2,003/3,684(54%) | 889/1,665(53%) | 736/1,229(60%) | <0.001 |
| sGA | 35/1,010(3.5%) | 16/666(2.4%) | 11/527(2.1%) | 0.2 | 168/2,217(7.6%) | 79/1,200(6.6%) | 28/846(3.3%) | <0.001 | 485/3,684(13%) | 186/1,665(11%) | 70/1,229(5.7%) | <0.001 |
| Single birth | 661/1,010(65%) | 391/666(59%) | 330/527(63%) | 0.02 | 1,542/2,217(70%) | 848/1,200(71%) | 595/846(70%) | 0.8 | 2,581/3,684(70%) | 1,177/1,665(71%) | 825/1,229(67%) | 0.089 |
| 1-min Apgar score≤3 | 113/1,001(11%) | 90/665(14%) | 55/517(11%) | 0.2 | 95/2,212(4.3%) | 65/1,200(5.4%) | 53/843(6.3%) | 0.58 | 106/3,680(2.9%) | 44/1,664(2.6%) | 34/1,224(2.8%) | 0.9 |

SD: standard deviation; GA: gestational age; sGA: small for gestational age

**Supplementary Table5 Maternal and Neonatal Characteristics of the Study Population Born on Weekday Stratified by Delivery Type**

| **Characteristic, n/N (%)** | **Cesarean delivery** | | | | **Vaginal delivery** | | | |
| --- | --- | --- | --- | --- | --- | --- | --- | --- |
| **Daytime, N = 4,993** | **Evening, N = 2,073** | **Night, N = 1,094** | **p-value** | **Daytime, N = 1,915** | **Evening, N = 1,456** | **Night, N = 1,507** | **p-value** |
| **Maternal characteristics** |  |  |  |  |  |  |  |  |
| Maternal Age, Mean(SD), y | 31.50(4.88) | 31.53(4.84) | 31.18(4.69) | 0.13 | 30.40(4.75) | 30.31(4.72) | 30.54(4.81) | 0.5 |
| Maternal Diabetics | 1,085/4,988(22%) | 395/2,071(19%) | 266/1,094(24%) | 0.002 | 354/1,913(19%) | 290/1,453(20%) | 331/1,501(22%) | 0.037 |
| Hypertensive disorders | 1,794/4,988(36%) | 677/2,071(33%) | 185/1,094(17%) | <0.001 | 93/1,912(4.9%) | 65/1,454(4.5%) | 53/1,505(3.5%) | 0.2 |
| Antenatal steroids | 4,334/4,973(87%) | 1,708/2,069(83%) | 877/1,091(80%) | <0.001 | 1,543/1,904(81%) | 1,182/1,449(82%) | 1,191/1,500(79%) | 0.3 |
| Receive MgSO4 | 3,318/4,958(67%) | 1,227/2,066(59%) | 626/1,088(58%) | <0.001 | 1,048/1,893(55%) | 785/1,447(54%) | 798/1,499(53%) | 0.5 |
| Placental abruption | 265/4,992(5.3%) | 165/2,073(8.0%) | 129/1,094(12%) | <0.001 | 79/1,915(4.1%) | 67/1,456(4.6%) | 76/1,507(5.0%) | 0.4 |
| Placenta previa | 425/4,992(8.5%) | 214/2,073(10%) | 181/1,094(17%) | <0.001 | 76/1,915(4.0%) | 64/1,456(4.4%) | 64/1,507(4.2%) | 0.8 |
| Chorioamnionitis | 865/4,993(17%) | 371/2,073(18%) | 216/1,094(20%) | 0.2 | 449/1,915(23%) | 357/1,456(25%) | 334/1,507(22%) | 0.3 |
| Premature rupture of membranes>24h | 2,783/4,950(56%) | 1,138/2,061(55%) | 643/1,081(59%) | 0.067 | 1,329/1,901(70%) | 1,028/1,447(71%) | 1,039/1,497(69%) | 0.6 |
| Cervical incompetence | 290/4,993(5.8%) | 166/2,073(8.0%) | 97/1,094(8.9%) | <0.001 | 233/1,915(12%) | 224/1,456(15%) | 186/1,507(12%) | 0.012 |
| Birth weight, Mean(SD) | 1,315.63(301.68) | 1,311.07(308.74) | 1,376.02(303.61) | <0.001 | 1,293.25(351.20) | 1,276.51(337.58) | 1,303.25(334.48) | 0.11 |
| **Neonatal characteristics** |  |  |  |  |  |  |  |  |
| Male | 2,716/4,993(54%) | 1,101/2,073(53%) | 649/1,094(59%) | 0.003 | 1,098/1,915(57%) | 822/1,456(56%) | 861/1,507(57%) | 0.9 |
| sGA | 630/4,993(13%) | 256/2,073(12%) | 81/1,094(7.4%) | <0.001 | 58/1,915(3.0%) | 25/1,456(1.7%) | 28/1,507(1.9%) | 0.017 |
| Single birth | 3,411/4,993(68%) | 1,383/2,073(67%) | 612/1,094(56%) | <0.001 | 1,371/1,915(72%) | 1,033/1,456(71%) | 1,137/1,507(75%) | 0.01 |
| 1-min Apgar score≤3 | 222/4,988(4.5%) | 120/2,073(5.8%) | 65/1,089(6.0%) | 0.018 | 92/1,902(4.8%) | 79/1,454(5.4%) | 77/1,494(5.2%) | 0.7 |

SD: standard deviation; GA: gestational age; sGA: small for gestational age
